# Supplementary material
Source: Springer Nature journal article supplement (https://www.springermedizin.de/resource/supplementary/13058_2011_2974_MOESM16_ESM.pdf/9702984)

chr13 (q13.1)

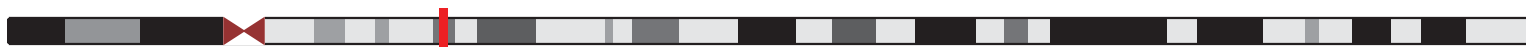

Scale  
chr13:

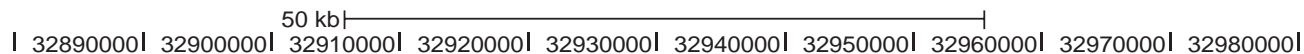

RefSeq Genes

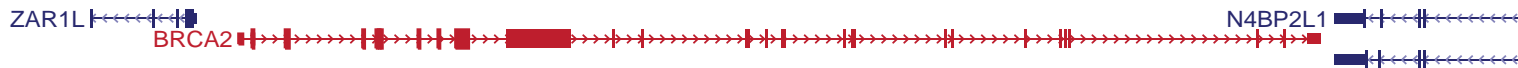

Reg Features

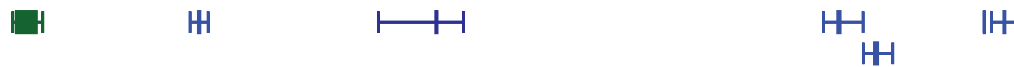

DAE SNP

★

Functional SNPs

1

2

3

Expression  
Haplotype

Low

Hap 2  
Hap 5

High [ Hap 4

C/EBP $\alpha$

DBP

DBP

HMGA1

ZF5

Linkage  
Disequilibrium  
in CEU

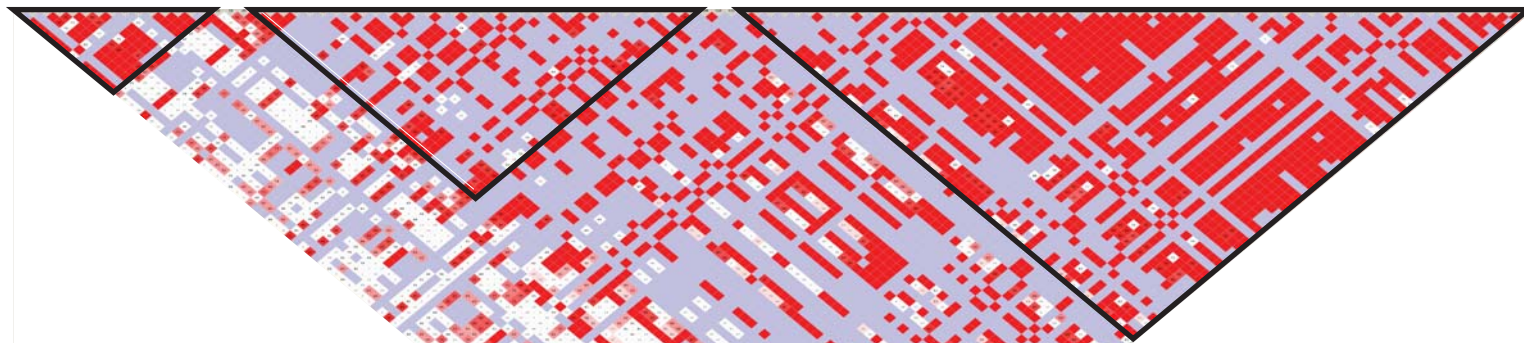

Supplement: MOESM16 [file 9702984]
